# Supplementary material for: Development and deployment of a mid-cost CO 2 sensor monitoring network to support atmospheric inverse modeling for quantifying urban CO 2 emissions in Paris
Source: Copernicus journal article supplement (doi:10.5194/amt-17-5821-2024), 2024-10-02
Supplement: Supplementary file 1 [file amt-17-5821-2024-supplement.pdf]

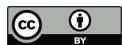

*Supplement of*

## **Development and deployment of a mid-cost CO<sub>2</sub> sensor monitoring network to support atmospheric inverse modeling for quantifying urban CO<sub>2</sub> emissions in Paris**

**Jinghui Lian et al.**

*Correspondence to:* Jinghui Lian ([jinghui.lian@suez.com](mailto:jinghui.lian@suez.com)) and Olivier Laurent ([olivier.laurent@lsce.ipsl.fr](mailto:olivier.laurent@lsce.ipsl.fr))

The copyright of individual parts of the supplement might differ from the article licence.

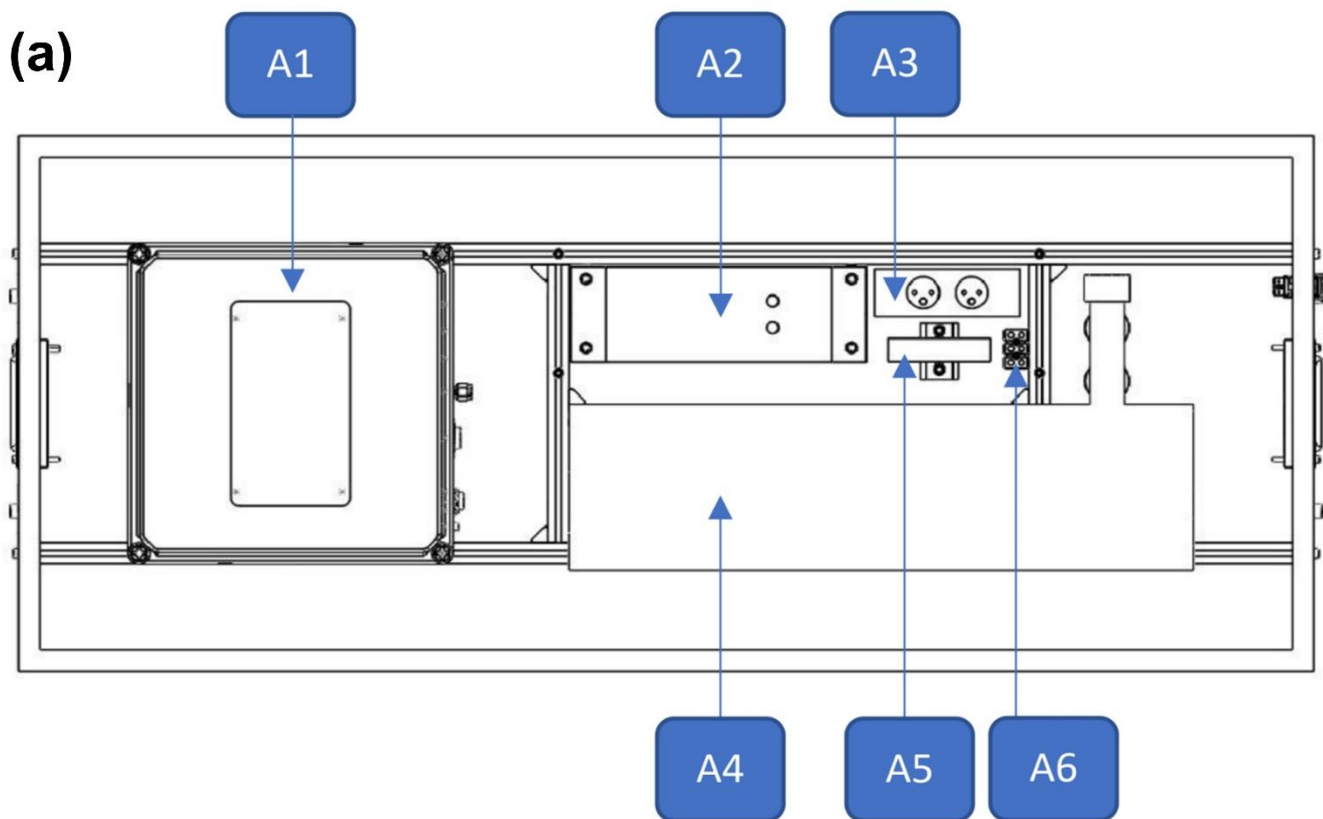

| Item | Description                   |
|------|-------------------------------|
| A1   | Slot for HPP sensor box       |
| A2   | Slot for flushing pump        |
| A3   | Power strips                  |
| A4   | Slot for target gas container |
| A5   | 12V power supply              |
| A6   | Terminal block                |

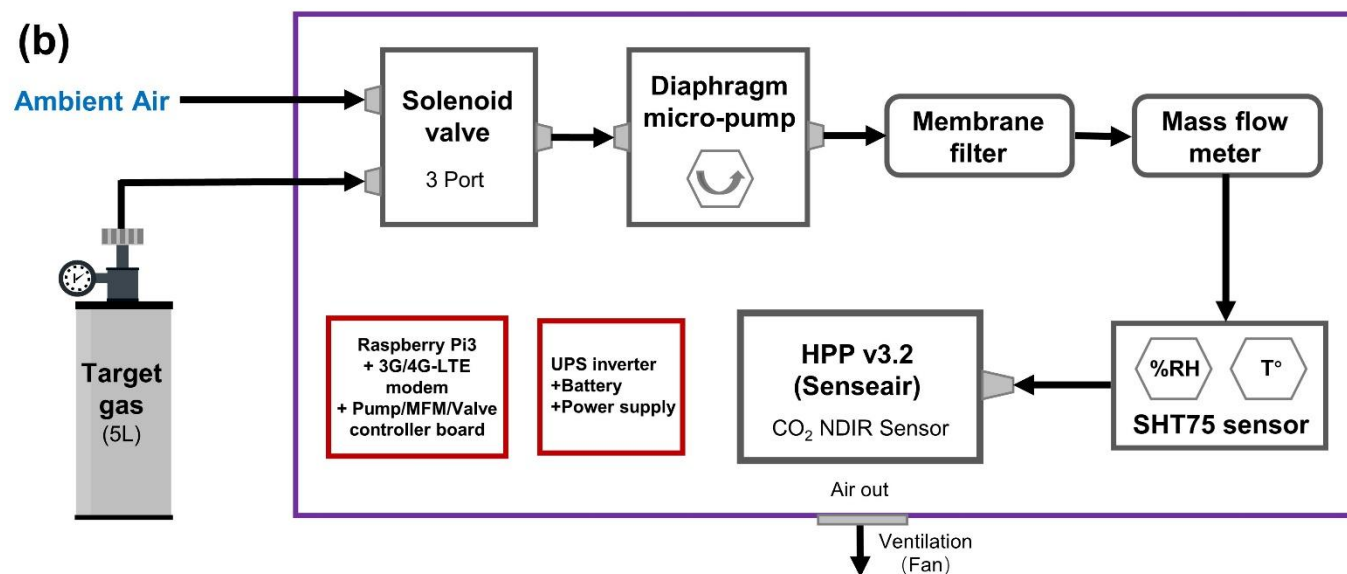

Figure S1. (a) Schematic of the integrated HPP CO<sub>2</sub> instrument for the field deployment, (b) Plumbing design of the airflow inside the integrated HPP sensor box, as shown in Figure 1b and located at A1 in (a). Figure (a) was made by © Eloneo (<https://eloneo.fr/>)

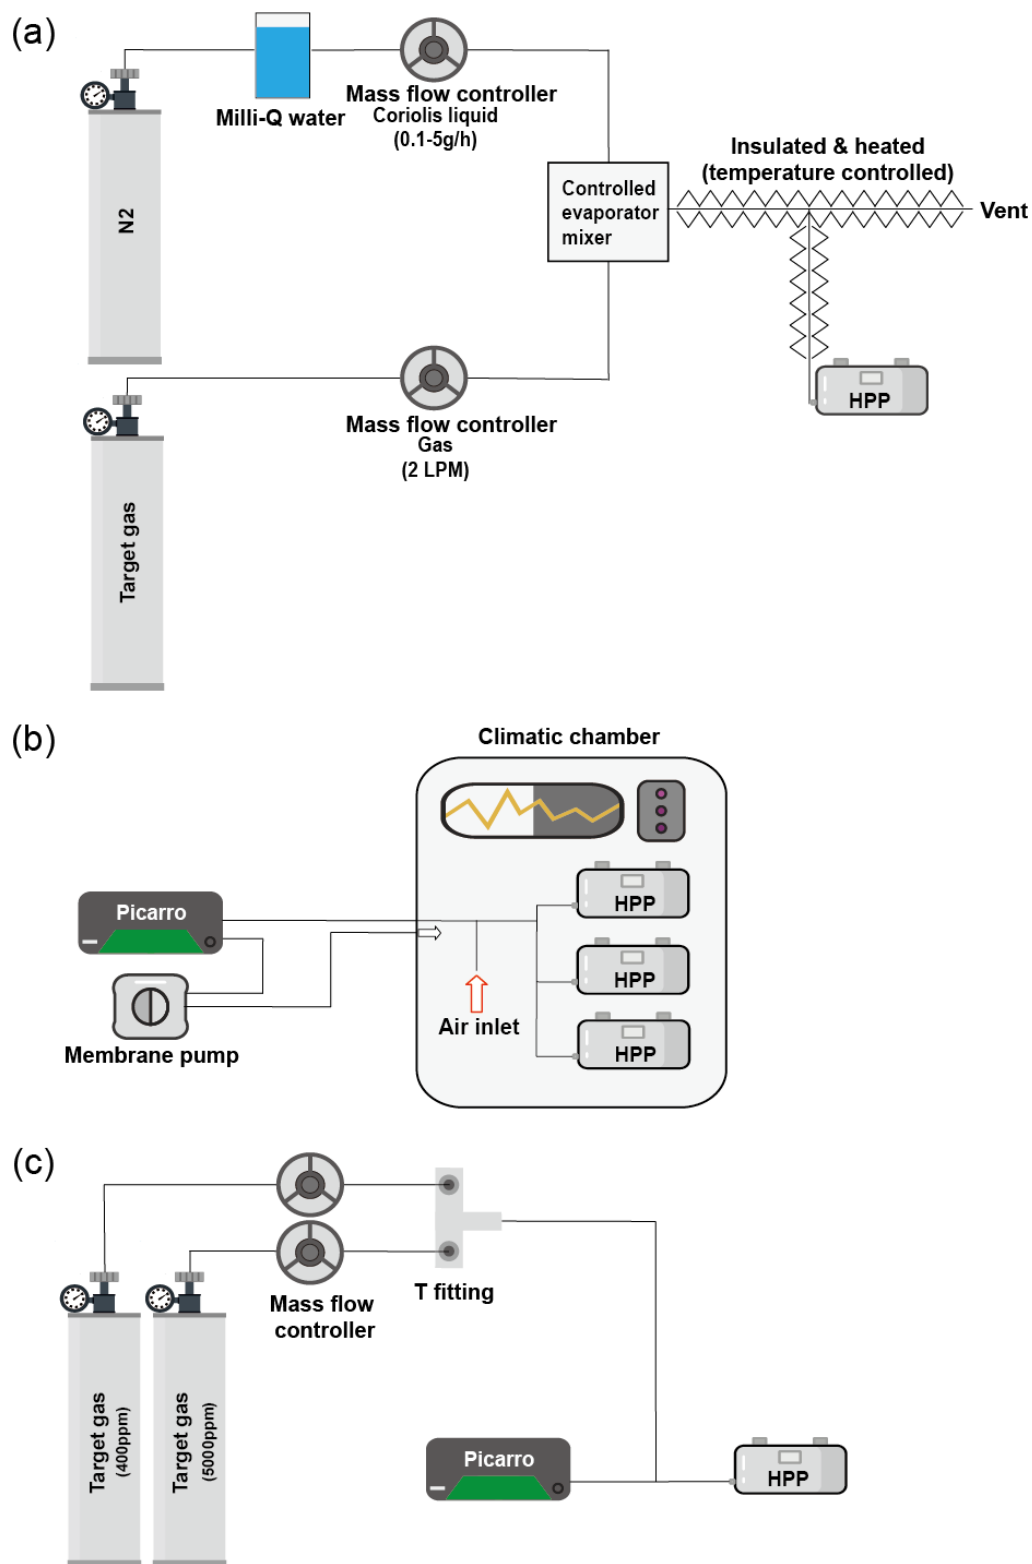

**Figure S2. Schematic of the HPP laboratory (a) water vapor sensitivity test, (b) pressure and temperature sensitivity tests and (c) CO<sub>2</sub> sensitivity test for the calibration procedure. Note that all 8 HPP instruments have been subjected to these tests.**

(a) H<sub>2</sub>O (Quadratic polynomial regression)

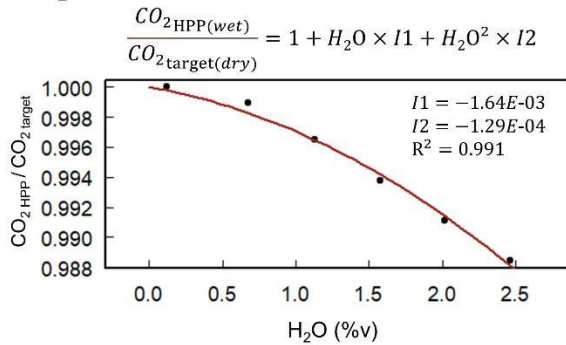

(b) Pressure (Linear regression)

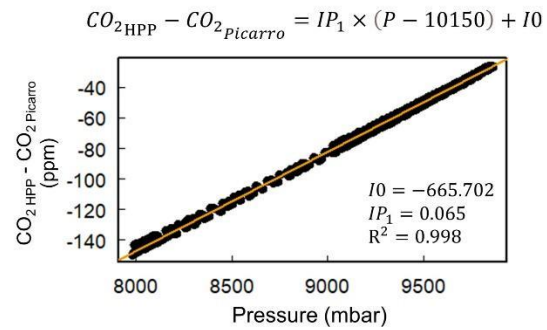

(c) Temperature (Quadratic polynomial regression)

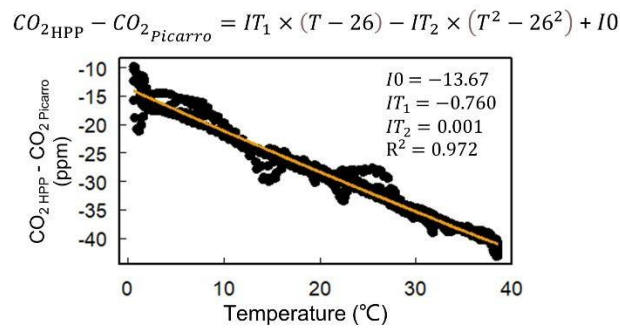

(d) CO<sub>2</sub> mole fraction (Linear regression)

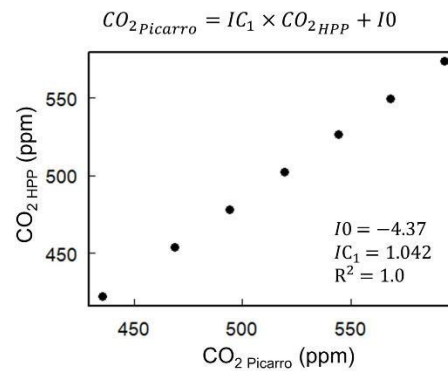

**Figure S3. Relationships between the raw 1-minute averaged CO<sub>2</sub> mole fraction reported by one of the HPP sensors (HPP3) and variations in H<sub>2</sub>O, T, P and CO<sub>2</sub> mole fraction in the sensitivity tests, respectively. The derived regression coefficients are used in the CO<sub>2</sub> calibration equation.**

5

### Section S1

To mitigate delays in sensor responses and ensure stability, thorough CO<sub>2</sub> flushing of the sensor cell is necessary. During the CO<sub>2</sub> correction coefficient  $IC_1$  determination process, we sequentially sampled CO<sub>2</sub> mole fraction for a duration of 10 minutes, with 7 minutes dedicated to flushing and only the last 3 minutes of data used. During the on-site daily target gas injection for the  $CO_{2offset}$  calculation, we sampled CO<sub>2</sub> mole fraction for a duration of 3 minutes, with 2 minutes of flushing and only the last minute of data used.

10

The differences in flushing times are due to two reasons. First, the CO<sub>2</sub> correction coefficient  $IC_1$  is determined through a multipoint CO<sub>2</sub> regression using the seven mole fraction values assigned within the 400-600 ppm range. Conversely, the CO<sub>2</sub> concentration in the target tank (which contains dry compressed natural air, pressurized at 200 bars and calibrated in CO<sub>2</sub>) is supposed to be close to the ambient air CO<sub>2</sub> concentration on-site during midday. The step between two different CO<sub>2</sub> concentrations in the  $IC_1$  determination process is greater than that during the target tank injection for drift correction, thus requiring a longer flushing time to achieve stabilization. Second, the CRDS and the mid-cost HPP sensor do not measure at the same flow rate, approximately 0.25 LPM for the CRDS and about 1 LPM for the HPP. They also have different precision targets. The CRDS sensor requires an extended period of target gas measurements to achieve a stability of less than 0.05 ppm, which is suitable for applications beyond this specific

15

20

intercomparison. Therefore, the flushing time in the  $IC_1$  determination process, when the HPP sensor measures in parallel with the CRDS, is expected to be longer.

Before implementing this setting, we carried out several sensitivity tests on the sensor performance with a daily injection of target gas lasting 5 minutes at LSCE laboratory. Figure S4 shows the evolution of target gas injection duration in relation to the differences in  $CO_2$  concentration between the other 4 minutes and the 3<sup>rd</sup> minute at one HPP sensor (HPP3) over 26 days. It demonstrates that a 3-minute target gas injection, specifically utilizing the 3<sup>rd</sup> minute data, proved to be sufficient. The added value of the 4<sup>th</sup>- and 5<sup>th</sup>- minute injection is rather limited. Therefore, the choice of a two-minute flush serves as a good compromise between maintaining good sensor performance (ensuring a target accuracy of 1 ppm) and minimizing gas consumption (thereby extending the lifespan of the tank and reducing associated maintenance requirements).

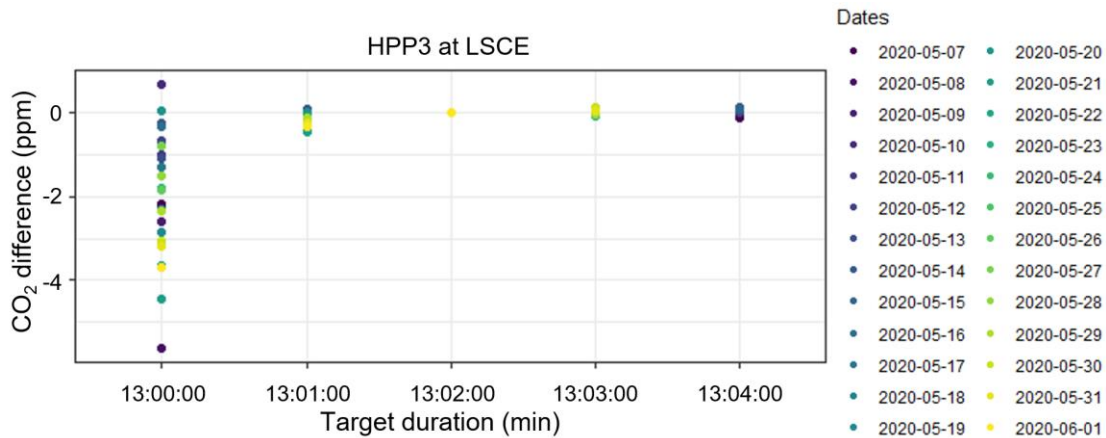

**Figure S4. The evolution of target gas injection duration in relation to the differences in  $CO_2$  concentration between the other 4 minutes and the 3<sup>rd</sup> minute at one HPP sensor (HPP3), with a daily injection of target gas lasting 5 minutes over 26 days at LSCE.**

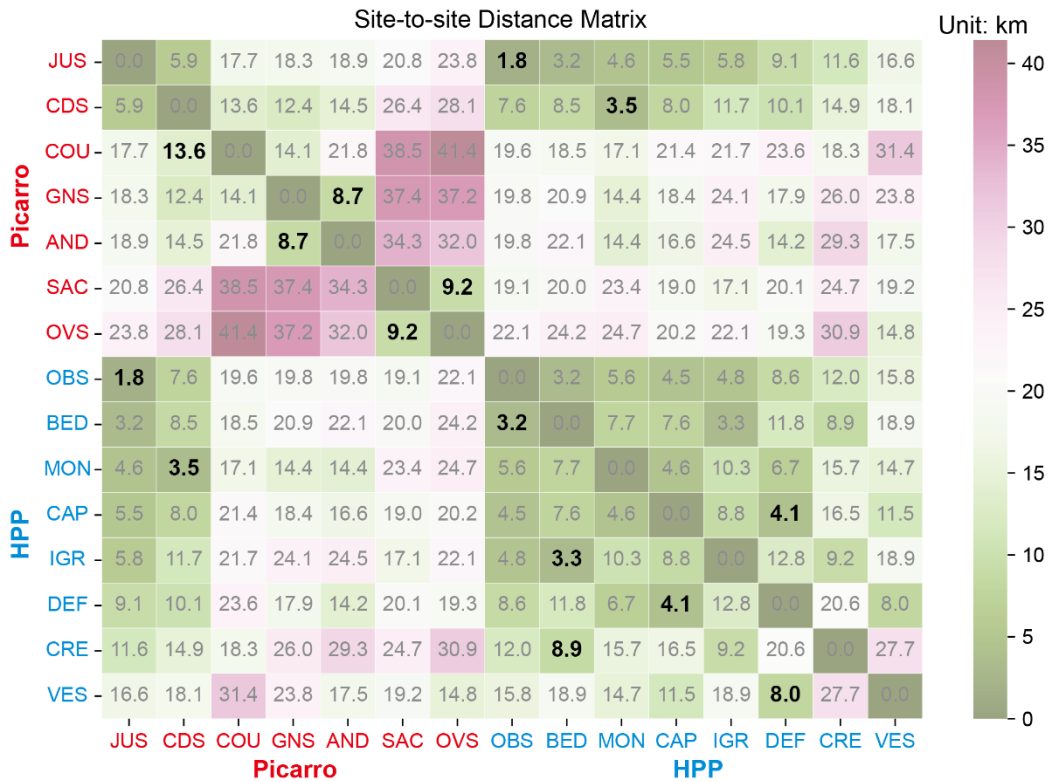

| Site (km)   | JUS | CDS | COU  | GNS | AND | SAC | OVS | OBS | BED | MON | CAP | IGR | DEF | CRE | VES | Average |
|-------------|-----|-----|------|-----|-----|-----|-----|-----|-----|-----|-----|-----|-----|-----|-----|---------|
| Picarro     | 5.9 | 5.9 | 13.6 | 8.7 | 8.7 | 9.2 | 9.2 |     |     |     |     |     |     |     |     | 8.7     |
| HPP         |     |     |      |     |     |     |     | 3.2 | 3.2 | 4.6 | 4.1 | 3.3 | 4.1 | 8.9 | 8   | 4.9     |
| Picarro+HPP | 1.8 | 3.5 | 13.6 | 8.7 | 8.7 | 9.2 | 9.2 | 1.8 | 3.2 | 3.5 | 4.1 | 3.3 | 4.1 | 8.9 | 8   | 6.1     |

Figure S5. Site-to-site distance in kilometers. The distances to the nearest site for each site are highlighted in bold black font (read by rows) and are summarized in the table.

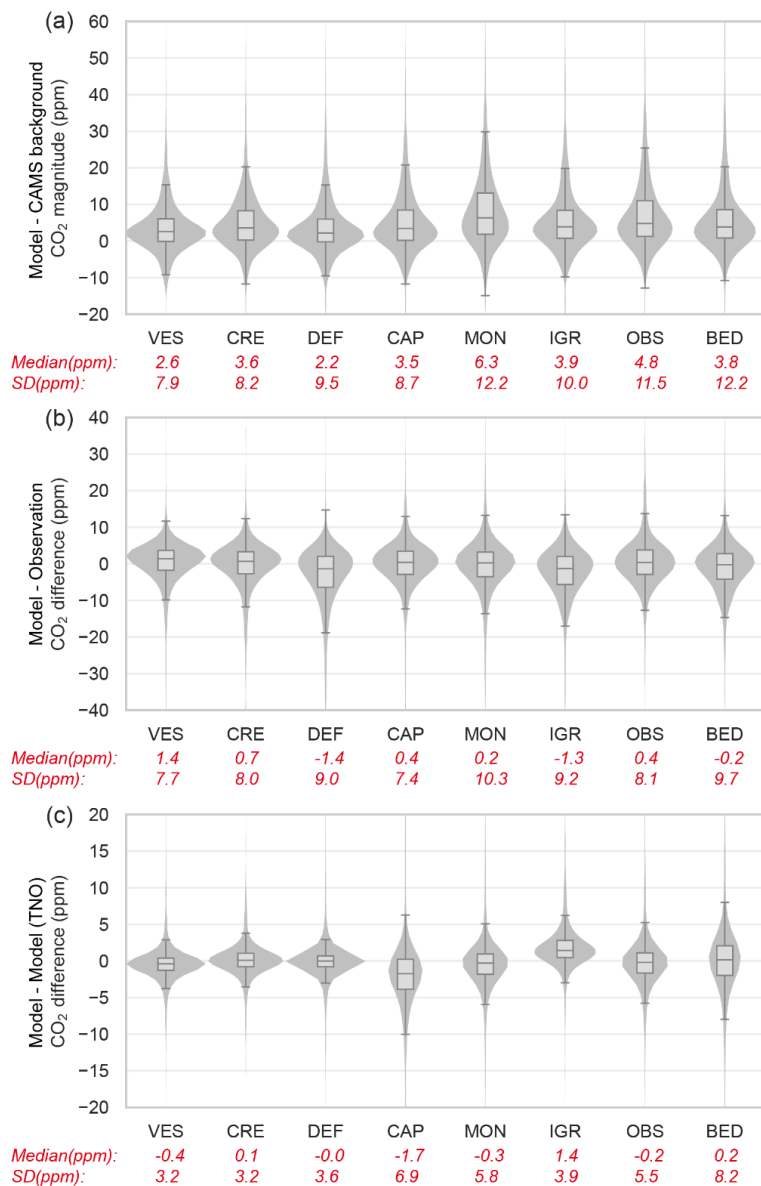

**Figure S6. (a) Distribution of the local hourly afternoon (12-17 UTC) CO<sub>2</sub> signals at each HPP station from July 2020 to December 2022. This is computed by using the WRF-Chem simulated total CO<sub>2</sub> (fossil fuel, biogenic, and background sources) minus the background CO<sub>2</sub> mole fractions derived from the CAMS dataset. (b) Distribution of the differences in hourly afternoon CO<sub>2</sub> mole fraction between the WRF-Chem model and the observations at each HPP station from July 2020 to December 2022. (c) Distribution of the differences in simulated hourly afternoon CO<sub>2</sub> mole fraction, using Origins.earth (default) and TNO 1km inventory (Dellaert et al., 2019) as fossil fuel CO<sub>2</sub> emission inputs for the WRF-Chem model respectively. This model sensitivity test was carried out for the year 2018 (Lian et al., 2023). The midpoint, the box and the whiskers represent the 0.5 quantile, 0.25/0.75 quantiles, and 0.1/0.9 quantiles respectively.**

**SI Reference:**

Dellaert S., Super I., Visschedijk A., Denier van der Gon H.A.C.: High resolution scenarios of CO<sub>2</sub> and CO emissions. <https://www.che-project.eu/sites/default/files/2019-05/CHE-D4-2-V1-0.pdf>, 2019.

Lian, J., Lauvaux, T., Utard, H., Bréon, F.-M., Broquet, G., Ramonet, M., Laurent, O., Albarus, I., Chariot, M., Kotthaus, S., Haeffelin, M., Sanchez, O., Perrussel, O., Denier van der Gon, H. A., Dellaert, S. N. C., and Ciais, P.: Can we use atmospheric CO<sub>2</sub> measurements to verify emission trends reported by cities? Lessons from a 6-year atmospheric inversion over Paris, *Atmos. Chem. Phys.*, 23, 8823–8835, <https://doi.org/10.5194/acp-23-8823-2023>, 2023.

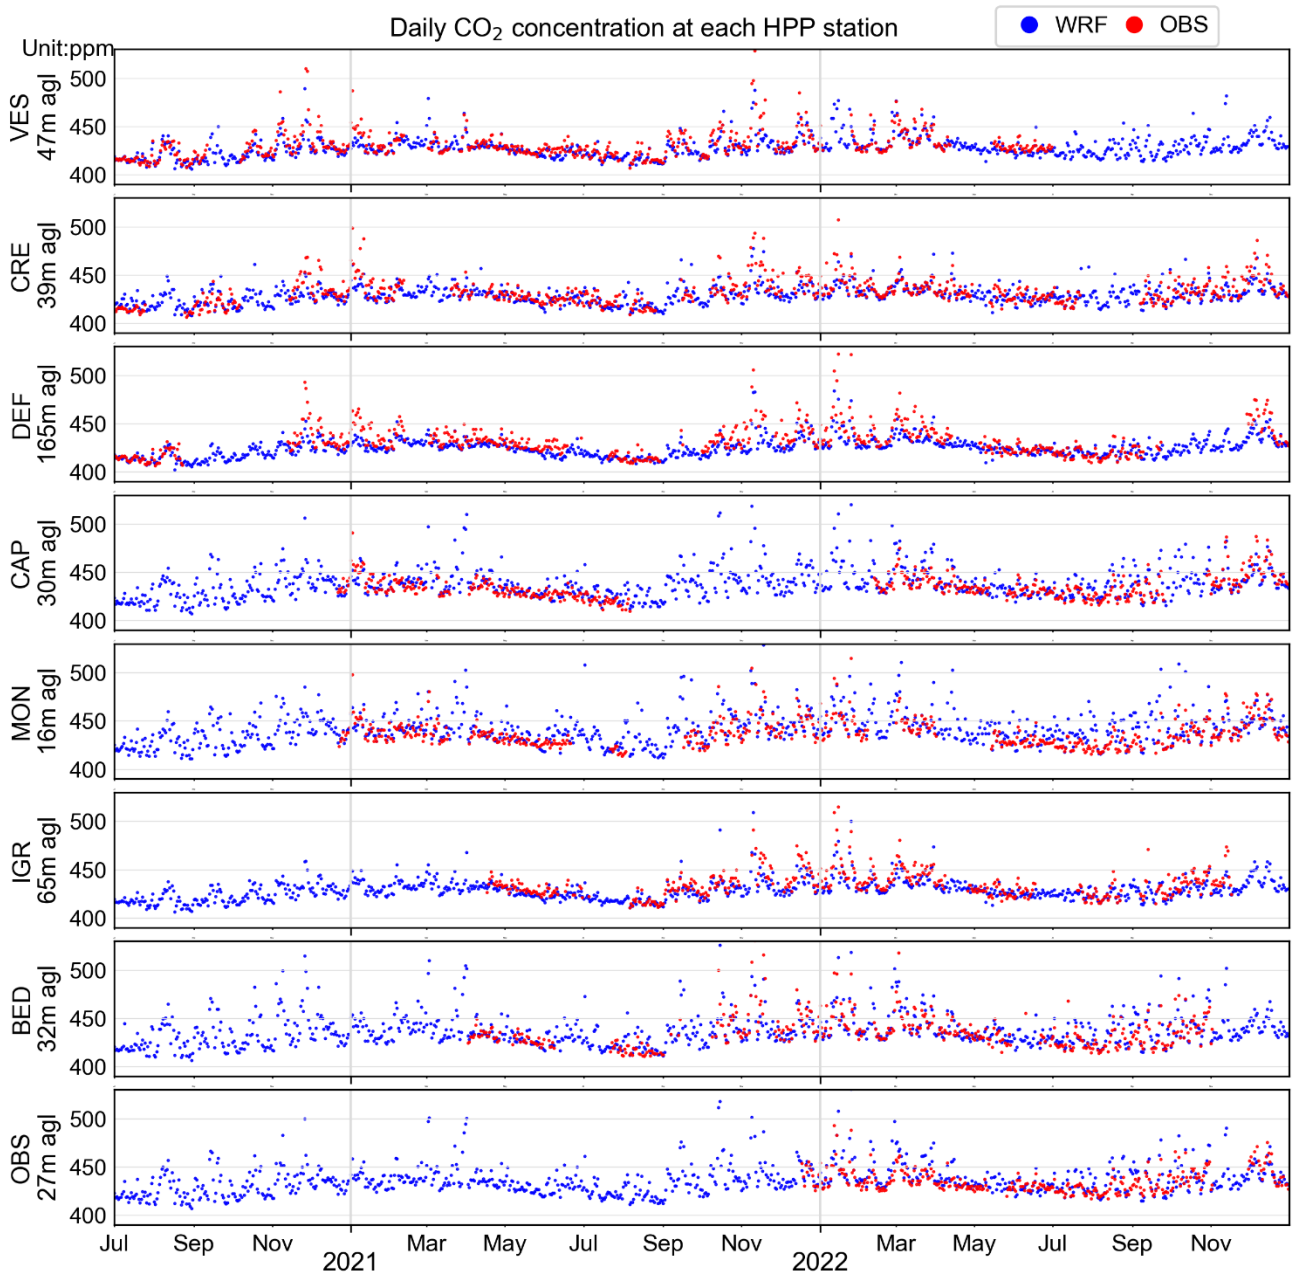

**Figure S7. Time series of the modeled and observed daily CO<sub>2</sub> concentration at each HPP station.**



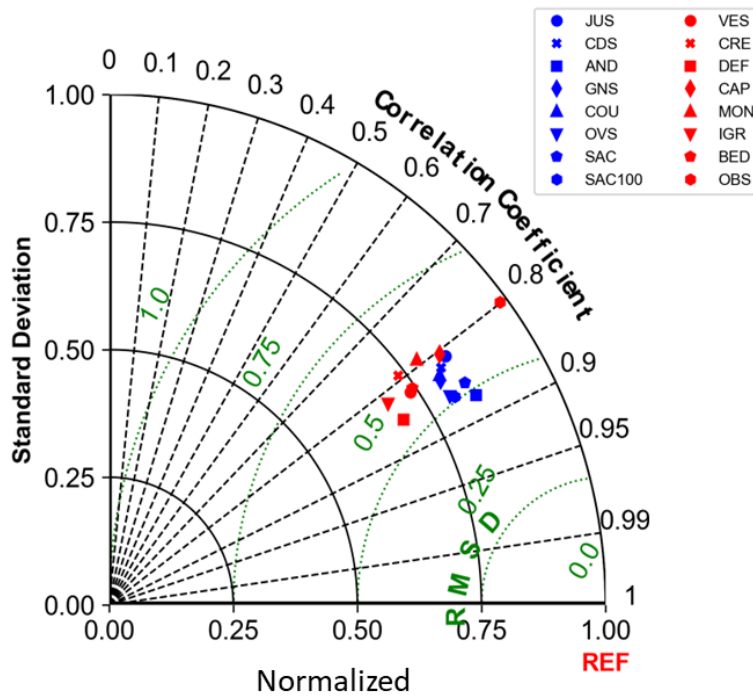

Figure S8. Comparisons of the observed and modeled hourly afternoon (12-17 UTC) CO<sub>2</sub> mole fractions at 7 CRDS and 8 HPP stations over the period of July 2020 to December 2022. The SAC station has two air inlets placed at 15 m and 100 m above ground level, respectively.

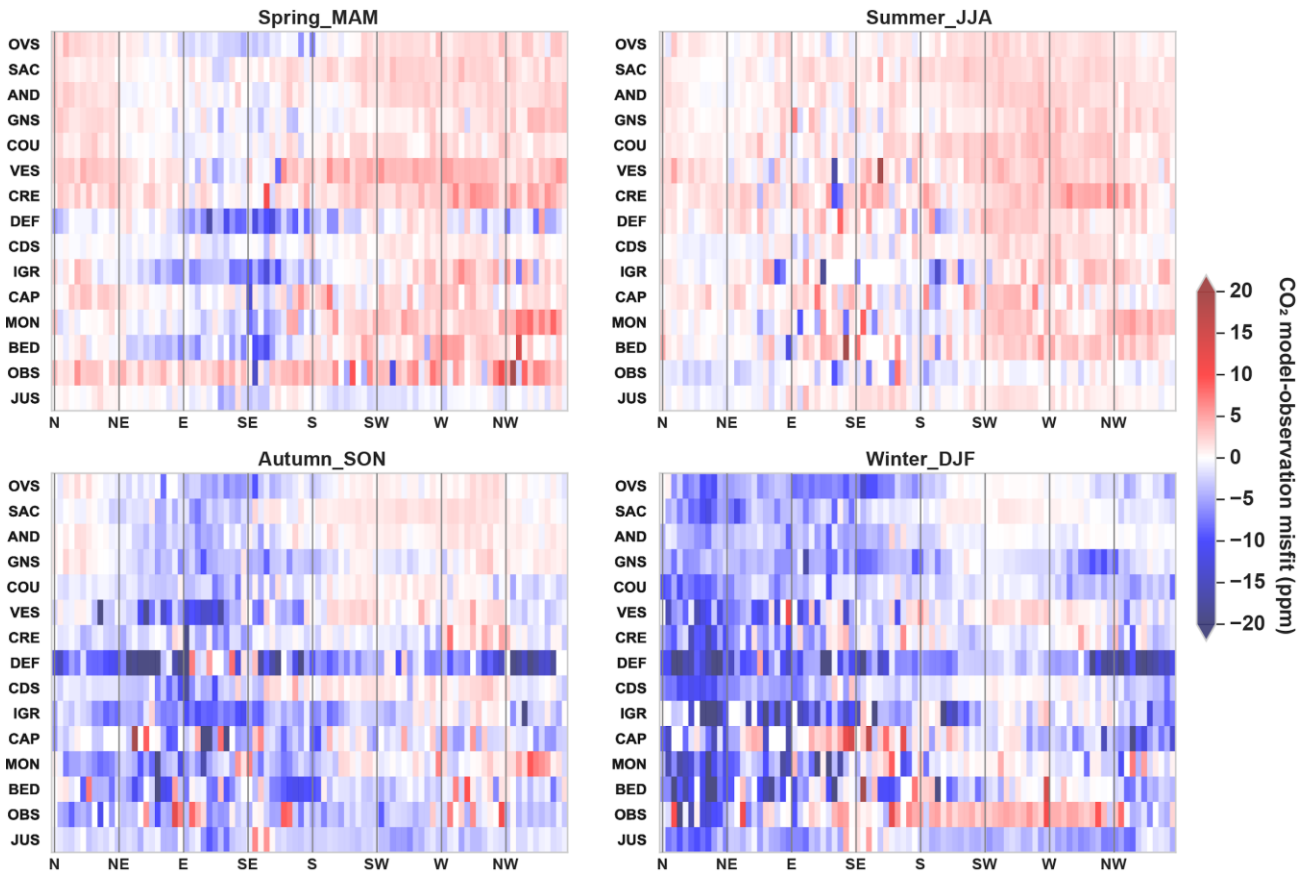

5

Figure S9. Model-observation misfits in hourly afternoon (12-17 UTC) CO<sub>2</sub> mole fractions, averaged accounting for wind direction for four seasons at 7 CRDS and 8 HPP stations over the period of July 2020 to December 2022. The stations are displayed in a bottom-to-top sequence, corresponding to their increasing distance from the JUS station.

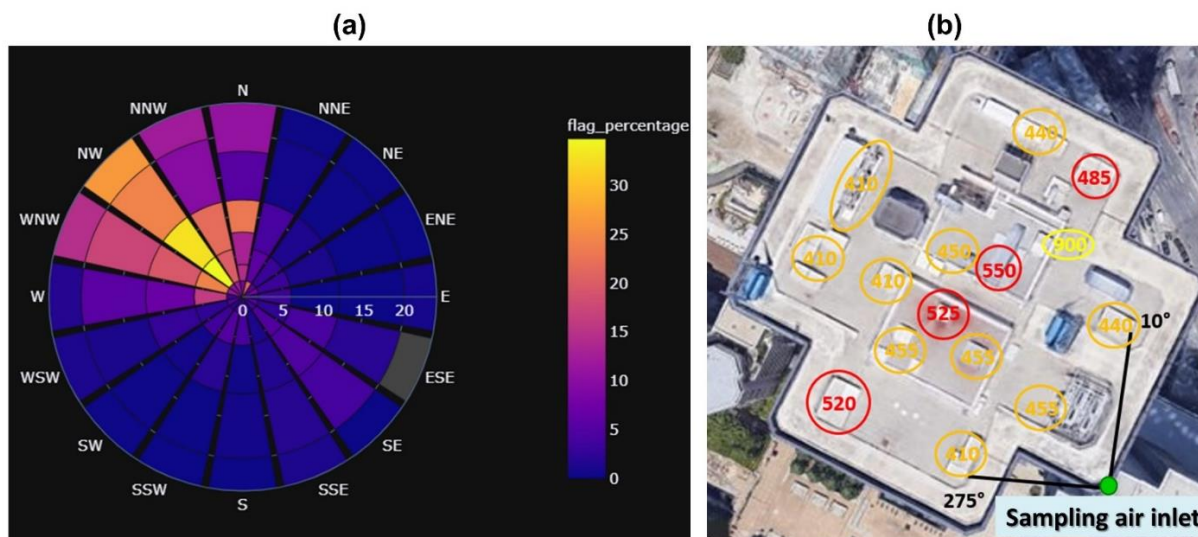

Figure S10. (a) Average spike percentage of observed CO<sub>2</sub> mole fractions as a function of wind speed and direction at DEF station from January to May 2021. (b) A photo of the rooftop at DEF station indicates potential local sources of contamination, primarily originating from the direction spanning 275° to 10°. Red circle: active and high-flow sources of contamination during the visit. Orange circle: potential sources of contamination not active or low flow during the visit. Yellow circle: a source of active contamination but structurally at low flow (e.g., sanitary facilities). Green dot: the location of the sampling air inlet. The image in (b) was extracted from © Google Maps.

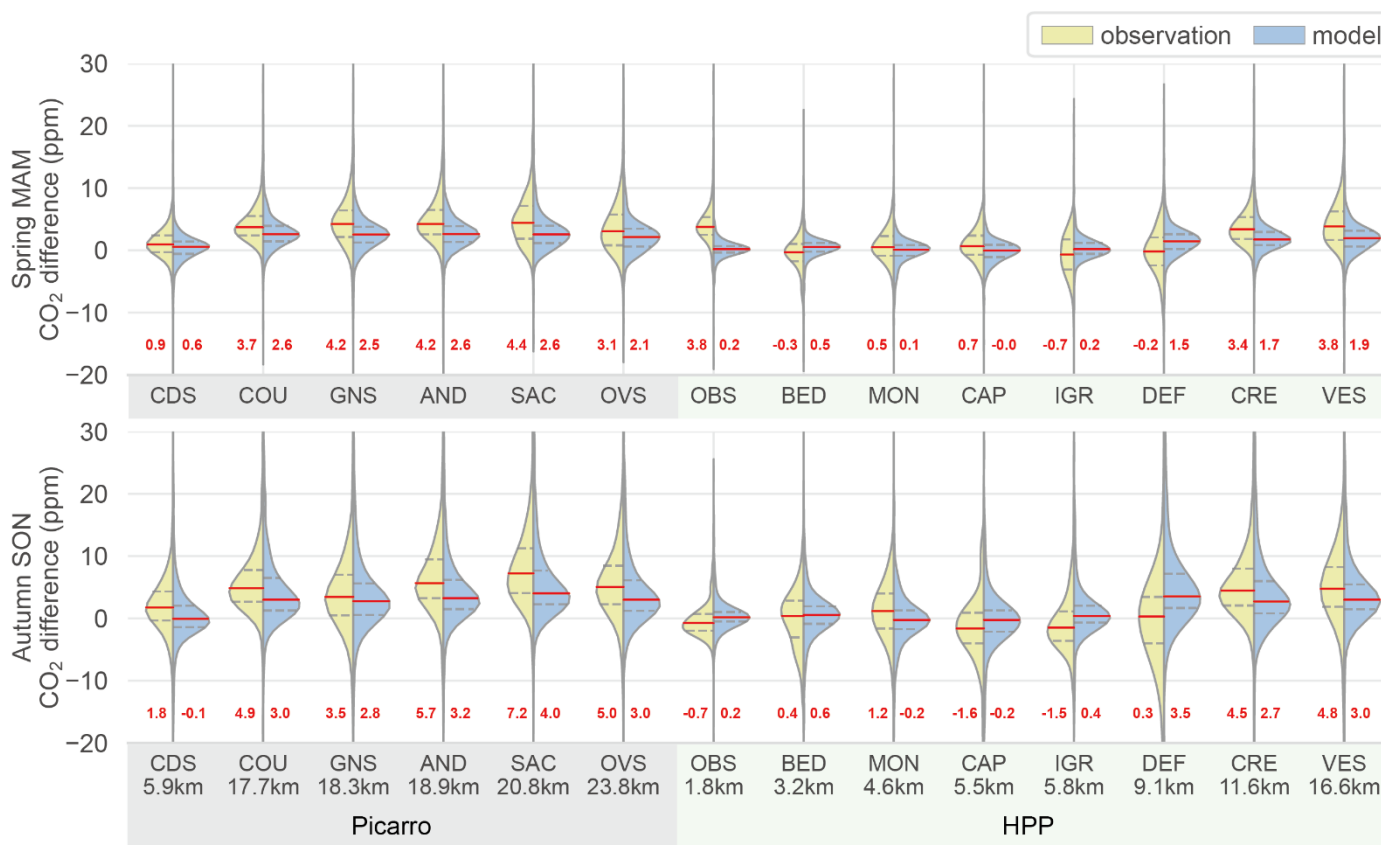

Figure S11. Distributions of the observed and modeled hourly afternoon (12-17 UTC) CO<sub>2</sub> mole fraction differences between JUS and the other stations for spring and autumn, spanning from July 2020 to December 2022. The red solid lines and numbers represent the median values. The dash grey lines represent the first and third quartiles. The distances from each site to the JUS site (in kilometers) are provided on the x-labels.

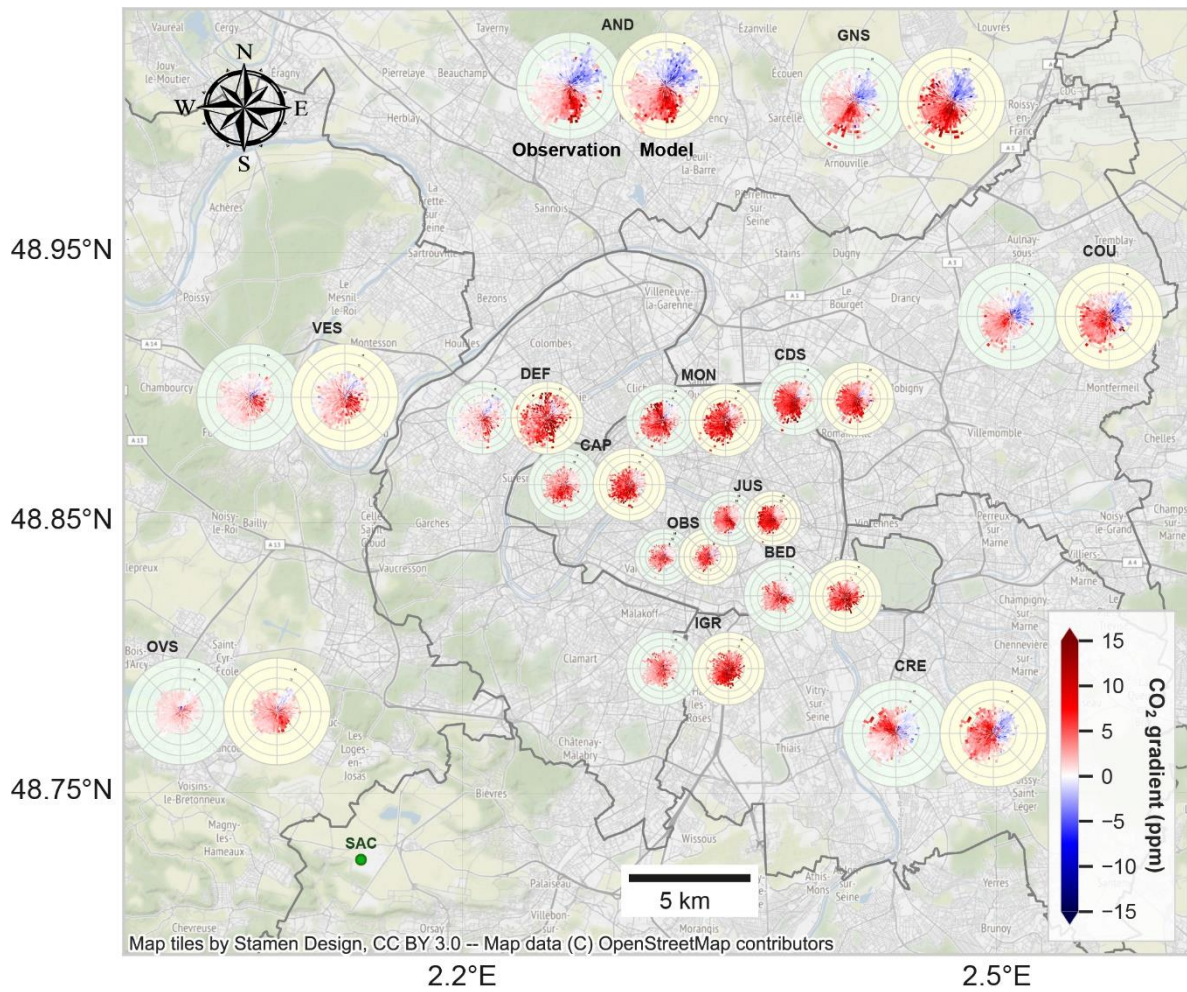

5 **Figure S12. Observed (green panel) and modeled (yellow panel) CO<sub>2</sub> mole fraction differences between all the other stations and SAC, averaged accounting for wind speed and direction over the period of July 2020 to December 2022. Only the afternoon (12-17 UTC) data are used. The CO<sub>2</sub> differences are calculated as the other stations minus SAC. The different sizes of the polar panels hold no specific meaning and are merely adjusted to avoid overlaps.**

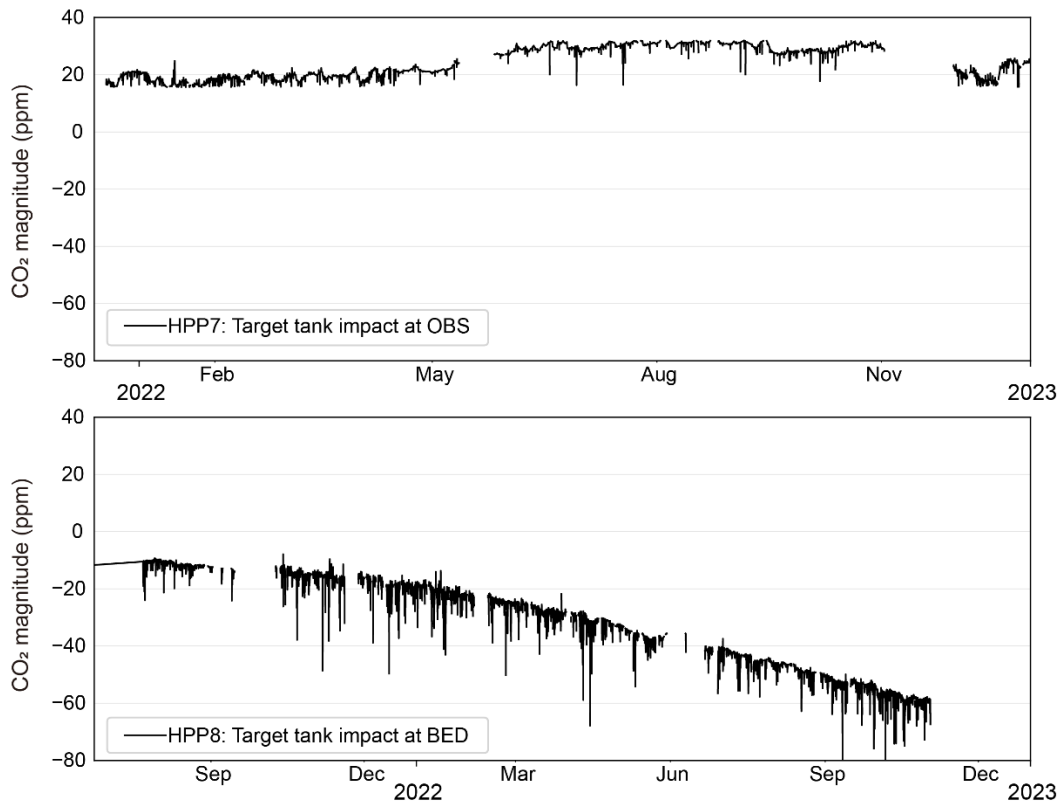

**Figure S13. Evolution of the impact of the daily target gas injection in the calibration at two HPP sensors. It was calculated as the  $CO_2$  differences before and after applying  $CO_{2offset}$  in Eq. (1).**

**5 Table S1. Ranges of acceptable values for critical physical parameters measured by the HPP instrument.**

| <b>Parameter (unit)</b>           | <b>Min value</b> | <b>Max value</b> |
|-----------------------------------|------------------|------------------|
| H <sub>2</sub> O (molar fraction) | 0.2%             | 4%               |
| Pump speed                        | 0.1              | 0.95             |
| Flowrate (L/min)                  | 0.4              | N/A              |
| CO <sub>2</sub> (ppm)             | 350              | 700              |
| Detector temperature (°C)         | 64.98            | 65.02            |
| Main mirror temperature (°C)      | 66.90            | 67.10            |
| Component block temperature (°C)  | 66.90            | 67.10            |
| Microcontroller temperature (°C)  | 0                | 50               |
